# Supplementary material for: Facile fabrication of 3D SnO2/nitrogen-doped graphene aerogels for superior lithium storage
Source: Royal Society of Chemistry journal article supplement (doi:10.1039/c5ra10475k), 2015-01-01
Supplement: c5ra10475k1.pdf [file c5ra10475k1.pdf]

## Supplementary Information

### Facile fabrication of 3D SnO<sub>2</sub>/Nitrogen-doped graphene aerogels for superior lithium storage

Xia Hong, Junfei Liang,\* Hua Fan and Lin Guo\*

Key Laboratory of Bio-Inspired Smart Interfacial Science and Technology of Ministry of Education, School of Chemistry & Environment, Beihang University, Beijing, 100191, P. R. China. E-mail: guolin@buaa.edu.cn; fax:010-82338162; Tel.:010-82338162.

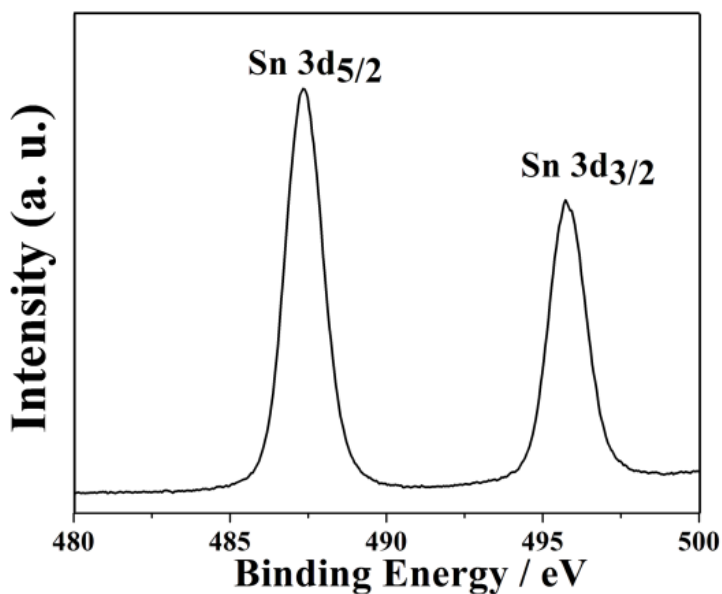

Fig. S1 Sn 3d XPS spectrum of the SNGA

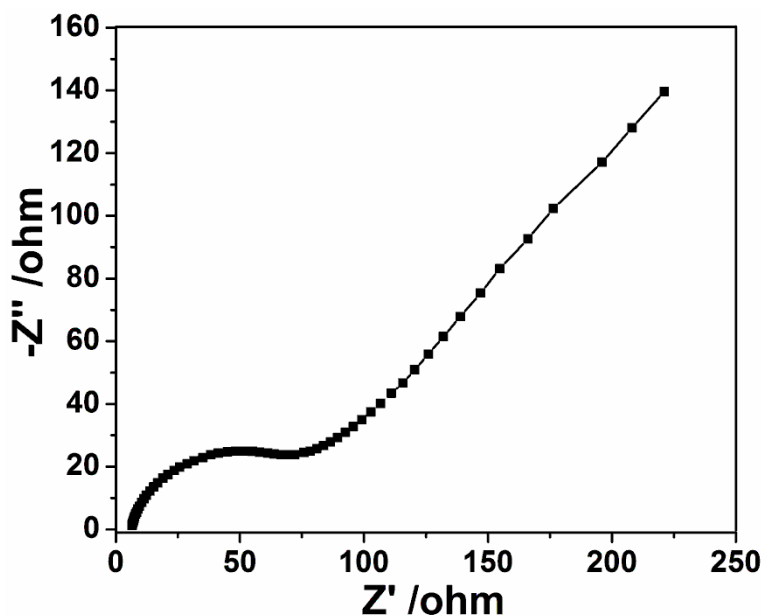

Fig. S2 Impedance Nyquist plots of SNGA after 5 cycles.
